# Supplementary material
Source: publisher figshare collection journal article supplement (https://tandf.figshare.com/ndownloader/files/38310826)
Supplement: Supplementary file 1 [file 38310826]

**Supp. Table 7:** Hf isotope compositions of zircons from the early Paleozoic crust-mantle- and crust-derived granitoids in the orogenic core.

| **Sample** | **Age (Ma)** | **εHf(t)** | **1s** | **tDM1 (Ga)** | **tDM2 (Ga)** | **References** |
| --- | --- | --- | --- | --- | --- | --- |
| WZ17-1-1 |  |  |  |  |  | **Li et al., 2021b** |
| 5 | 449 | -3.60 | 0.71 | 1.19 | 1.64 |
| 6 | 452 | -2.35 | 0.74 | 1.15 | 1.56 |
| 7 | 448 | -4.70 | 0.85 | 1.24 | 1.71 |
| 8 | 451 | -3.66 | 0.91 | 1.20 | 1.65 |
| 9 | 445 | -5.56 | 0.72 | 1.26 | 1.76 |
| 10 | 448 | -4.75 | 0.87 | 1.24 | 1.71 |
| 11 | 454 | -5.80 | 0.88 | 1.30 | 1.78 |
| 12 | 453 | -3.02 | 0.79 | 1.17 | 1.61 |
| 13 | 450 | -5.13 | 0.87 | 1.27 | 1.74 |
| 21 | 448 | -4.21 | 0.92 | 1.22 | 1.68 |
| WZ17-2 |  |  |  |  |  |
| 1 | 460 | -4.74 | 0.65 | 1.25 | 1.72 |
| 2 | 451 | -5.11 | 0.83 | 1.26 | 1.74 |
| 5 | 456 | -5.55 | 0.88 | 1.29 | 1.77 |
| 6 | 453 | -5.02 | 0.86 | 1.26 | 1.73 |
| 9 | 451 | -1.44 | 0.79 | 1.12 | 1.50 |
| 10 | 457 | -4.22 | 0.82 | 1.22 | 1.69 |
| 20 | 456 | -4.85 | 0.87 | 1.25 | 1.73 |
| 21 | 460 | -3.68 | 0.95 | 1.21 | 1.65 |
| 22 | 463 | -2.03 | 0.86 | 1.15 | 1.55 |
| 24 | 462 | -4.50 | 0.89 | 1.25 | 1.71 |
| WZ17-3-1 |  |  |  |  |  |
| 1 | 464 | -4.16 | 0.76 | 1.22 | 1.69 |
| 7 | 454 | -6.21 | 0.73 | 1.29 | 1.81 |
| 8 | 454 | -2.48 | 0.88 | 1.16 | 1.57 |
| 9 | 457 | -4.43 | 0.67 | 1.22 | 1.70 |
| 11 | 454 | -4.85 | 0.92 | 1.24 | 1.72 |
| 13 | 457 | -3.15 | 0.84 | 1.18 | 1.62 |
| 18 | 452 | -3.36 | 0.78 | 1.19 | 1.63 |
| 19 | 449 | -5.14 | 0.80 | 1.25 | 1.74 |
| 21 | 456 | -4.64 | 0.76 | 1.23 | 1.71 |
| 25 | 458 | -3.40 | 0.74 | 1.19 | 1.63 |
| WZ17-4 |  |  |  |  |  |
| 1 | 461 | -4.76 | 0.85 | 1.25 | 1.72 |
| 2 | 468 | -3.41 | 0.79 | 1.20 | 1.64 |
| 5 | 463 | -5.16 | 0.82 | 1.27 | 1.75 |
| 6 | 460 | -3.45 | 0.74 | 1.19 | 1.64 |
| 9 | 451 | -5.38 | 0.77 | 1.26 | 1.75 |
| 13 | 461 | -4.46 | 0.76 | 1.24 | 1.70 |
| 14 | 463 | -2.09 | 0.83 | 1.15 | 1.56 |
| 15 | 459 | -3.01 | 0.87 | 1.19 | 1.61 |
| 17 | 460 | -4.85 | 0.89 | 1.26 | 1.73 |
| 18 | 445 | -6.29 | 0.92 | 1.30 | 1.81 |
| WZ17-5-4 |  |  |  |  |  |
| 1 | 452 | -5.57 | 0.86 | 1.27 | 1.77 |
| 2 | 456 | -6.39 | 0.74 | 1.31 | 1.82 |
| 4 | 460 | -6.71 | 0.67 | 1.32 | 1.85 |
| 5 | 456 | -5.43 | 0.84 | 1.27 | 1.76 |
| 6 | 459 | -4.29 | 0.72 | 1.22 | 1.69 |
| 7 | 444 | -5.15 | 0.70 | 1.24 | 1.73 |
| 12 | 456 | -3.75 | 0.77 | 1.20 | 1.66 |
| 13 | 458 | -4.37 | 0.74 | 1.23 | 1.70 |
| 14 | 460 | -4.73 | 0.86 | 1.25 | 1.72 |
| 22 | 459 | -3.99 | 0.88 | 1.22 | 1.67 |
| WZ17-5-5 |  |  |  |  |  |
| 1 | 463 | -6.83 | 0.81 | 1.33 | 1.86 |
| 4 | 460 | -3.06 | 0.78 | 1.18 | 1.62 |
| 5 | 463 | -2.25 | 0.71 | 1.15 | 1.57 |
| 6 | 464 | -5.42 | 0.79 | 1.28 | 1.77 |
| 7 | 465 | -5.20 | 0.81 | 1.26 | 1.75 |
| 9 | 453 | -8.12 | 0.77 | 1.37 | 1.93 |
| 12 | 463 | -3.34 | 0.83 | 1.19 | 1.64 |
| 14 | 457 | -3.73 | 0.84 | 1.20 | 1.65 |
| 17 | 461 | -4.47 | 0.72 | 1.24 | 1.70 |
| 22 | 464 | -2.94 | 0.79 | 1.18 | 1.61 |
| WZ17-6-2 |  |  |  |  |  |
| 1 | 464 | -3.25 | 0.87 | 1.20 | 1.63 |
| 2 | 454 | -3.26 | 0.78 | 1.18 | 1.62 |
| 4 | 458 | -3.44 | 0.88 | 1.19 | 1.64 |
| 5 | 463 | -2.86 | 0.88 | 1.17 | 1.60 |
| 7 | 468 | -6.34 | 0.79 | 1.32 | 1.83 |
| 15 | 463 | -3.00 | 0.81 | 1.18 | 1.61 |
| 16 | 465 | -1.37 | 0.91 | 1.12 | 1.51 |
| 19 | 463 | -2.93 | 0.85 | 1.18 | 1.61 |
| 20 | 464 | -3.63 | 0.77 | 1.20 | 1.65 |
| 21 | 470 | -1.40 | 0.92 | 1.12 | 1.52 |
| WZ17-6-3 |  |  |  |  |  |
| 1 | 464 | -4.37 | 0.79 | 1.24 | 1.70 |
| 2 | 461 | -6.97 | 0.78 | 1.34 | 1.86 |
| 5 | 460 | -3.15 | 0.89 | 1.19 | 1.62 |
| 7 | 455 | -6.28 | 0.88 | 1.32 | 1.81 |
| 8 | 454 | -4.06 | 0.74 | 1.22 | 1.67 |
| 9 | 456 | -3.04 | 0.74 | 1.17 | 1.61 |
| 11 | 458 | -6.63 | 0.71 | 1.32 | 1.84 |
| 16 | 459 | -5.32 | 0.81 | 1.26 | 1.76 |
| 17 | 456 | -1.51 | 0.84 | 1.11 | 1.51 |
| 20 | 469 | -5.61 | 0.77 | 1.28 | 1.78 |
| WZ17-6-4 |  |  |  |  |  |
| 1 | 454 | -3.78 | 0.85 | 1.21 | 1.66 |
| 2 | 444 | -4.22 | 0.74 | 1.21 | 1.68 |
| 3 | 443 | 0.71 | 1.02 | 1.03 | 1.36 |
| 4 | 453 | -2.65 | 0.84 | 1.16 | 1.58 |
| 7 | 445 | -3.85 | 0.90 | 1.20 | 1.65 |
| 8 | 449 | -4.80 | 0.85 | 1.24 | 1.72 |
| 9 | 455 | -4.73 | 0.93 | 1.25 | 1.72 |
| 12 | 446 | -7.02 | 0.89 | 1.33 | 1.85 |
| 14 | 449 | -3.95 | 0.81 | 1.20 | 1.66 |
| 19 | 444 | -4.88 | 0.83 | 1.24 | 1.72 |
| WZ17-6-5 |  |  |  |  |  |
| 1 | 466 | -4.13 | 0.87 | 1.23 | 1.69 |
| 4 | 467 | -3.93 | 1.02 | 1.22 | 1.68 |
| 5 | 468 | -1.67 | 0.90 | 1.14 | 1.53 |
| 6 | 470 | -5.69 | 1.02 | 1.31 | 1.79 |
| 11 | 460 | -5.46 | 0.67 | 1.28 | 1.77 |
| 12 | 462 | -4.11 | 0.99 | 1.22 | 1.68 |
| 14 | 461 | -4.86 | 0.71 | 1.26 | 1.73 |
| 15 | 462 | -4.29 | 1.00 | 1.23 | 1.69 |
| 22 | 466 | -2.20 | 1.09 | 1.18 | 1.57 |
| 20 | 465 | -5.22 | 0.74 | 1.28 | 1.76 |
| WZ17-7-1 |  |  |  |  |  |
| 3 | 446 | -3.72 | 0.83 | 1.21 | 1.65 |
| 4 | 449 | -3.35 | 0.73 | 1.18 | 1.62 |
| 5 | 457 | -3.10 | 0.84 | 1.17 | 1.62 |
| 7 | 454 | -2.23 | 0.77 | 1.15 | 1.56 |
| 12 | 444 | -3.59 | 0.83 | 1.19 | 1.64 |
| 14 | 448 | -2.77 | 0.78 | 1.17 | 1.59 |
| 16 | 457 | -3.64 | 0.72 | 1.20 | 1.65 |
| 17 | 456 | -5.52 | 0.89 | 1.28 | 1.77 |
| 20 | 455 | -3.69 | 0.82 | 1.20 | 1.65 |
| 24 | 453 | -2.67 | 0.82 | 1.16 | 1.58 |
| WZ17-7-2 |  |  |  |  |  |
| 2 | 441 | -3.83 | 0.79 | 1.20 | 1.65 |
| 3 | 441 | -14.69 | 1.06 | 1.63 | 2.33 |
| 5 | 446 | -4.94 | 0.81 | 1.25 | 1.72 |
| 7 | 445 | -4.50 | 0.86 | 1.23 | 1.69 |
| 8 | 441 | -3.60 | 0.91 | 1.19 | 1.63 |
| 9 | 445 | -4.33 | 0.71 | 1.22 | 1.68 |
| 12 | 437 | -11.15 | 0.91 | 1.49 | 2.11 |
| 14 | 447 | -3.70 | 0.83 | 1.20 | 1.64 |
| 18 | 444 | -5.36 | 0.76 | 1.25 | 1.75 |
| 17 | 439 | -2.21 | 0.74 | 1.13 | 1.54 |
| WZ17-7-3 |  |  |  |  |  |
| 1 | 445 | -4.49 | 0.88 | 1.23 | 1.69 |
| 2 | 447 | -2.85 | 0.82 | 1.17 | 1.59 |
| 4 | 444 | -5.19 | 0.85 | 1.26 | 1.74 |
| 5 | 445 | -4.64 | 0.92 | 1.24 | 1.70 |
| 8 | 440 | -3.82 | 0.79 | 1.20 | 1.65 |
| 9 | 449 | -7.98 | 1.04 | 1.39 | 1.92 |
| 11 | 443 | -1.74 | 0.91 | 1.11 | 1.52 |
| 12 | 450 | -5.45 | 0.95 | 1.28 | 1.76 |
| 13 | 442 | -3.73 | 0.75 | 1.19 | 1.64 |
| 14 | 442 | -3.36 | 0.82 | 1.18 | 1.62 |
| WZ17-7-6 |  |  |  |  |  |
| 2 | 459 | -3.33 | 0.74 | 1.19 | 1.63 |
| 5 | 455 | -3.12 | 0.85 | 1.19 | 1.61 |
| 6 | 464 | -4.23 | 0.83 | 1.24 | 1.69 |
| 7 | 455 | -2.85 | 0.84 | 1.17 | 1.60 |
| 9 | 456 | -6.34 | 0.83 | 1.30 | 1.82 |
| 10 | 449 | -2.48 | 0.82 | 1.15 | 1.57 |
| 12 | 459 | -5.24 | 0.71 | 1.26 | 1.75 |
| 13 | 462 | -9.22 | 1.00 | 1.43 | 2.00 |
| 16 | 463 | -3.92 | 0.80 | 1.22 | 1.67 |
| 20 | 459 | -3.31 | 0.88 | 1.20 | 1.63 |
| WZ17-10 |  |  |  |  |  |
| 1 | 458 | -4.13 | 0.78 | 1.22 | 1.68 |
| 3 | 464 | -5.57 | 0.72 | 1.28 | 1.78 |
| 4 | 461 | -1.89 | 0.83 | 1.14 | 1.54 |
| 6 | 464 | -4.61 | 0.87 | 1.25 | 1.72 |
| 9 | 455 | -4.59 | 0.76 | 1.23 | 1.71 |
| 12 | 459 | -2.20 | 0.83 | 1.15 | 1.56 |
| 13 | 465 | -3.66 | 0.82 | 1.21 | 1.66 |
| 16 | 451 | -4.34 | 0.78 | 1.22 | 1.69 |
| 20 | 459 | -3.79 | 0.87 | 1.22 | 1.66 |
| 21 | 458 | -5.14 | 0.83 | 1.27 | 1.74 |
| WZ17-11-1 |  |  |  |  |  |
| 1 | 475 | -2.45 | 0.81 | 1.17 | 1.59 |
| 3 | 479 | -27.02 | 1.12 | 2.13 | 3.13 |
| 4 | 480 | -4.62 | 0.74 | 1.26 | 1.73 |
| 5 | 483 | -0.87 | 0.80 | 1.11 | 1.49 |
| 7 | 482 | -3.19 | 0.80 | 1.20 | 1.64 |
| 11 | 479 | -4.38 | 0.83 | 1.25 | 1.71 |
| 12 | 475 | -6.87 | 0.89 | 1.34 | 1.87 |
| 13 | 484 | -2.15 | 0.82 | 1.17 | 1.58 |
| 14 | 475 | -3.09 | 0.80 | 1.19 | 1.63 |
| 18 | 473 | -1.35 | 0.91 | 1.14 | 1.52 |
| WZ17-11-2 |  |  |  |  |  |
| 1 | 447 | -3.97 | 0.74 | 1.20 | 1.66 |
| 3 | 443 | -1.45 | 0.69 | 1.10 | 1.50 |
| 4 | 446 | -4.61 | 0.83 | 1.23 | 1.70 |
| 5 | 444 | -5.76 | 0.85 | 1.27 | 1.77 |
| 6 | 452 | -1.04 | 0.77 | 1.09 | 1.48 |
| 9 | 447 | -5.16 | 0.88 | 1.25 | 1.74 |
| 10 | 446 | -3.30 | 0.72 | 1.17 | 1.62 |
| 15 | 448 | -4.39 | 0.86 | 1.23 | 1.69 |
| 20 | 444 | -4.07 | 0.87 | 1.20 | 1.67 |
| 22 | 443 | -2.69 | 0.74 | 1.14 | 1.58 |
| 14Y005-10Z |  |  |  |  |  | **Xie et al., 2020** |
| 1 | 446 | -6.38 | 0.06 |  | 1.82 |
| 2 | 446 | -3.95 | 0.07 |  | 1.67 |
| 3 | 446 | -3.55 | 0.09 |  | 1.65 |
| 4 | 446 | -1.68 | 0.09 |  | 1.53 |
| 5 | 446 | -4.97 | 0.09 |  | 1.74 |
| 6 | 446 | -2.53 | 0.08 |  | 1.58 |
| 7 | 446 | -2.83 | 0.09 |  | 1.6 |
| 8 | 446 | -1.31 | 0.07 |  | 1.51 |
| 9 | 446 | -5.21 | 0.07 |  | 1.75 |
| 10 | 446 | -7.79 | 0.11 |  | 1.91 |
| 11 | 446 | -4.36 | 0.1 |  | 1.7 |
| 12 | 446 | -5.2 | 0.07 |  | 1.75 |
| 13 | 446 | -0.87 | 0.07 |  | 1.48 |
| 14 | 446 | -4.39 | 0.08 |  | 1.7 |
| 15 | 446 | -4.55 | 0.08 |  | 1.71 |
| 16 | 446 | -2.08 | 0.07 |  | 1.56 |
| 17 | 446 | -7.94 | 0.07 |  | 1.92 |
| 18 | 446 | -5.38 | 0.09 |  | 1.76 |
| 19 | 446 | -2.4 | 0.07 |  | 1.58 |
| 20 | 446 | -5.67 | 0.08 |  | 1.78 |
| 14Y005-1Z |  |  |  |  |  |
| 1 | 446 | -6.45 | 0.06 |  | 1.83 |
| 2 | 446 | -8.79 | 0.06 |  | 1.98 |
| 3 | 446 | -8.4 | 0.05 |  | 1.95 |
| 4 | 446 | -7.98 | 0.08 |  | 1.93 |
| 5 | 446 | -11.95 | 0.1 |  | 2.17 |
| 6 | 446 | -9.04 | 0.07 |  | 1.99 |
| 7 | 446 | -12.01 | 0.07 |  | 2.18 |
| 8 | 446 | -5.8 | 0.07 |  | 1.79 |
| 9 | 446 | -8.74 | 0.07 |  | 1.97 |
| 10 | 446 | -9.79 | 0.05 |  | 2.04 |
| 11 | 446 | -10.61 | 0.07 |  | 2.09 |
| 12 | 446 | -8.89 | 0.06 |  | 1.98 |
| 13 | 446 | -11.05 | 0.07 |  | 2.12 |
| 14 | 446 | -8.84 | 0.06 |  | 1.98 |
| 15 | 446 | -9.35 | 0.05 |  | 2.01 |
| 16 | 446 | -8.53 | 0.08 |  | 1.96 |
| 17 | 446 | -8.11 | 0.05 |  | 1.93 |
| 18 | 446 | -9.33 | 0.07 |  | 2.01 |
| 19 | 446 | -8.83 | 0.06 |  | 1.98 |
| 20 | 446 | -13.68 | 0.07 |  | 2.28 |
| 21 | 446 | -9.6 | 0.05 |  | 2.03 |
| 22 | 446 | -8.85 | 0.05 |  | 1.98 |
| 23 | 446 | -8.57 | 0.06 |  | 1.96 |
| 24 | 446 | -8.32 | 0.04 |  | 1.95 |
| 14Y005-7Z |  |  |  |  |  |
| 1 | 446 | -8.37 | 0.05 |  | 1.95 |
| 2 | 446 | -7.52 | 0.04 |  | 1.9 |
| 3 | 446 | -8.29 | 0.04 |  | 1.94 |
| 4 | 446 | -7.36 | 0.05 |  | 1.89 |
| 5 | 446 | -10.5 | 0.04 |  | 2.08 |
| 6 | 446 | -8.98 | 0.05 |  | 1.99 |
| 7 | 446 | -8.39 | 0.05 |  | 1.95 |
| 8 | 446 | -6.5 | 0.05 |  | 1.83 |
| 9 | 446 | -10.39 | 0.04 |  | 2.08 |
| 10 | 446 | -6.86 | 0.04 |  | 1.85 |
| 11 | 446 | -10.24 | 0.05 |  | 2.07 |
| 12 | 446 | -9.45 | 0.05 |  | 2.02 |
| 13 | 446 | -8.4 | 0.04 |  | 1.95 |
| 14 | 446 | -6.58 | 0.05 |  | 1.84 |
| 15 | 446 | -6.37 | 0.04 |  | 1.82 |
| 16 | 446 | -9.54 | 0.05 |  | 2.02 |
| 17 | 446 | -7.54 | 0.04 |  | 1.9 |
| 18 | 446 | -8.17 | 0.04 |  | 1.94 |
| 19 | 446 | -7.46 | 0.05 |  | 1.89 |
| 20 | 446 | -9.85 | 0.04 |  | 2.04 |
| 21 | 446 | -8.63 | 0.05 |  | 1.97 |
| 22 | 446 | -9.16 | 0.05 |  | 2 |
| 23 | 446 | -11.26 | 0.08 |  | 2.13 |
| 24 | 446 | -5.23 | 0.06 |  | 1.75 |
| 14Y006-1Z |  |  |  |  |  |
| 1 | 446 | -7.62 | 0.05 |  | 1.9 |
| 2 | 446 | -9.74 | 0.05 |  | 2.03 |
| 3 | 446 | -7.21 | 0.05 |  | 1.88 |
| 4 | 446 | -8.02 | 0.05 |  | 1.93 |
| 5 | 446 | -9.23 | 0.05 |  | 2 |
| 6 | 446 | -7.04 | 0.04 |  | 1.87 |
| 7 | 446 | -7.3 | 0.05 |  | 1.88 |
| 8 | 446 | -7.3 | 0.05 |  | 1.88 |
| 9 | 446 | -10.01 | 0.05 |  | 2.05 |
| 10 | 446 | -11.59 | 0.05 |  | 2.15 |
| 11 | 446 | -7.91 | 0.06 |  | 1.92 |
| 12 | 446 | -8.05 | 0.05 |  | 1.93 |
| 13 | 446 | -7.84 | 0.04 |  | 1.92 |
| 14 | 446 | -10.73 | 0.05 |  | 2.1 |
| 15 | 446 | -6.4 | 0.05 |  | 1.83 |
| 16 | 446 | -4.28 | 0.08 |  | 1.69 |
| 17 | 446 | -7.3 | 0.05 |  | 1.88 |
| 18 | 446 | -7.16 | 0.05 |  | 1.87 |
| 19 | 446 | -9.22 | 0.05 |  | 2 |
| 20 | 446 | -7.08 | 0.05 |  | 1.87 |
| 21 | 446 | -8.03 | 0.05 |  | 1.93 |
| 22 | 446 | -9.03 | 0.05 |  | 1.99 |
| XW01 |  |  |  |  |  | **Xia et al., 2014** |
| 1 | 415 | -0.3 | 0.6 | 1.06 | 1.4 |
| 2 | 411 | 4.4 | 0.4 | 0.84 | 1.1 |
| 3 | 413 | -9 | 0.9 | 1.38 | 1.95 |
| 4 | 410 | -1.4 | 0.6 | 1.09 | 1.47 |
| 5 | 413 | 0.9 | 0.5 | 0.99 | 1.33 |
| 6 | 415 | -4.9 | 0.6 | 1.21 | 1.69 |
| 7 | 413 | 4.7 | 0.6 | 0.83 | 1.08 |
| 8 | 411 | 7.2 | 0.5 | 0.73 | 0.92 |
| 9 | 413 | 0.9 | 0.5 | 0.98 | 1.32 |
| 10 | 410 | 0.7 | 0.5 | 1.02 | 1.34 |
| 11 | 414 | -0.7 | 0.5 | 1.04 | 1.43 |
| 12 | 416 | 1 | 0.5 | 0.98 | 1.32 |
| 13 | 415 | 1.3 | 0.5 | 0.97 | 1.31 |
| 14 | 413 | -0.6 | 0.6 | 1.06 | 1.42 |
| 15 | 413 | -0.6 | 0.7 | 1.07 | 1.42 |
| 16 | 412 | -6.7 | 0.6 | 1.27 | 1.81 |
| 17 | 411 | 1.2 | 0.7 | 1 | 1.31 |
| 18 | 412 | 1.1 | 0.6 | 1 | 1.31 |
| 19 | 413 | 2 | 1 | 0.98 | 1.26 |
| 20 | 413 | -1.1 | 0.6 | 1.1 | 1.45 |
| 21 | 413 | -1 | 1 | 1.11 | 1.45 |
| XW02 |  |  |  |  |  |
| 1 | 414 | 5.2 | 0.6 | 0.84 | 1.05 |
| 2 | 411 | 4.4 | 0.7 | 0.88 | 1.1 |
| 3 | 414 | 2.5 | 0.7 | 0.96 | 1.23 |
| 4 | 413 | 5.4 | 0.4 | 0.82 | 1.04 |
| 5 | 416 | 4 | 0.6 | 0.88 | 1.13 |
| 6 | 414 | 3 | 0.6 | 0.93 | 1.2 |
| 7 | 407 | 4.3 | 0.7 | 0.87 | 1.11 |
| 8 | 415 | 4.7 | 0.5 | 0.88 | 1.09 |
| 9 | 413 | 3.7 | 0.5 | 0.9 | 1.15 |
| 10 | 413 | 3.5 | 0.6 | 0.91 | 1.16 |
| 11 | 417 | 0.7 | 1.2 | 1.03 | 1.35 |
| 12 | 413 | 5.5 | 1 | 0.83 | 1.03 |
| 13 | 413 | 4.7 | 0.5 | 0.84 | 1.08 |
| 14 | 413 | 4.2 | 0.5 | 0.88 | 1.12 |
| 16 | 413 | -3.8 | 0.5 | 1.19 | 1.62 |
| 17 | 414 | 5.3 | 0.5 | 0.81 | 1.04 |
| 18 | 413 | 2 | 0.7 | 0.99 | 1.26 |
| 19 | 412 | 1.6 | 0.5 | 0.97 | 1.28 |
| 20 | 413 | 3.7 | 0.5 | 0.89 | 1.15 |
| 21 | 413 | 3.7 | 0.7 | 0.91 | 1.15 |
| DT01 |  |  |  |  |  |
| 1 | 410 | 8.3 | 0.5 | 0.69 | 0.85 |
| 2 | 407 | 7.9 | 0.4 | 0.7 | 0.87 |
| 3 | 410 | 8.3 | 0.6 | 0.68 | 0.85 |
| 4 | 408 | 7.2 | 0.6 | 0.73 | 0.92 |
| 5 | 408 | 7.7 | 0.6 | 0.71 | 0.89 |
| 6 | 412 | 6.4 | 0.5 | 0.76 | 0.97 |
| 7 | 413 | 8 | 0.5 | 0.7 | 0.87 |
| 8 | 408 | 7 | 0.6 | 0.74 | 0.93 |
| 9 | 409 | 7.6 | 0.6 | 0.71 | 0.9 |
| 10 | 406 | 5.9 | 0.6 | 0.77 | 1 |
| 11 | 406 | 5.7 | 0.6 | 0.79 | 1.01 |
| 12 | 410 | 6 | 0.5 | 0.78 | 1 |
| 13 | 408 | 7.6 | 0.7 | 0.71 | 0.9 |
| 14 | 409 | 7.9 | 0.5 | 0.7 | 0.87 |
| 15 | 409 | 6.5 | 0.6 | 0.75 | 0.97 |
| 16 | 410 | 7.6 | 0.5 | 0.71 | 0.9 |
| 17 | 412 | 5.6 | 0.5 | 0.8 | 1.03 |
| 18 | 409 | 9.3 | 0.6 | 0.64 | 0.78 |
| 19 | 407 | 5.8 | 0.5 | 0.79 | 1.01 |
| 20 | 409 | 7 | 0.5 | 0.74 | 0.94 |
| DT02 |  |  |  |  |  |
| 1 | 408 | 7.4 | 0.7 | 0.72 | 0.91 |
| 2 | 411 | 7.3 | 1 | 0.72 | 0.92 |
| 3 | 411 | 6.1 | 0.8 | 0.78 | 0.99 |
| 4 | 402 | 7.1 | 0.7 | 0.74 | 0.92 |
| 5 | 410 | 6.4 | 0.8 | 0.77 | 0.98 |
| 6 | 411 | 6.4 | 0.6 | 0.76 | 0.97 |
| 7 | 404 | 6.3 | 0.9 | 0.77 | 0.98 |
| 8 | 429 | 7.5 | 0.6 | 0.74 | 0.92 |
| 9 | 414 | 10.3 | 0.8 | 0.61 | 0.73 |
| 10 | 423 | 6.8 | 0.7 | 0.76 | 0.96 |
| 11 | 397 | 6.7 | 0.8 | 0.74 | 0.94 |
| 12 | 411 | 5.8 | 0.8 | 0.79 | 1.01 |
| 13 | 411 | 6 | 0.6 | 0.78 | 1 |
| 14 | 410 | 6.2 | 0.6 | 0.77 | 0.99 |
| 15 | 402 | 5.4 | 0.6 | 0.79 | 1.03 |
| 16 | 409 | 7 | 0.6 | 0.75 | 0.94 |
| 17 | 405 | 5.9 | 0.6 | 0.78 | 1 |
| 18 | 411 | 7.8 | 0.7 | 0.7 | 0.88 |
| 19 | 411 | 7.2 | 0.7 | 0.73 | 0.92 |
| 20 | 411 | 5 | 1.1 | 0.83 | 1.07 |
| 21 | 412 | 8.9 | 0.9 | 0.67 | 0.81 |
| 22 | 411 | 6.5 | 0.7 | 0.75 | 0.97 |
| DT04 |  |  |  |  |  |
| 1 | 403 | 2.2 | 0.6 | 0.93 | 1.24 |
| 2 | 409 | 1.8 | 0.5 | 0.95 | 1.27 |
| 3 | 405 | -0.2 | 0.5 | 1.05 | 1.39 |
| 4 | 410 | 2.3 | 0.7 | 0.94 | 1.23 |
| 5 | 410 | 1.1 | 0.6 | 0.99 | 1.31 |
| 6 | 408 | 3 | 0.6 | 0.91 | 1.19 |
| 7 | 410 | 2.2 | 0.5 | 0.94 | 1.24 |
| 8 | 408 | 3.1 | 0.4 | 0.89 | 1.18 |
| 9 | 411 | 2.3 | 0.5 | 0.93 | 1.24 |
| 10 | 408 | 0.9 | 0.4 | 0.99 | 1.32 |
| 11 | 410 | 2.7 | 0.7 | 0.93 | 1.21 |
| 12 | 412 | 2.7 | 0.4 | 0.92 | 1.21 |
| 13 | 410 | 4 | 0.5 | 0.86 | 1.13 |
| 14 | 410 | 3 | 0.6 | 0.9 | 1.19 |
| 15 | 410 | 1 | 0.7 | 1 | 1.32 |
| 16 | 415 | 1.7 | 0.4 | 0.96 | 1.27 |
| 17 | 410 | 3 | 0.7 | 0.91 | 1.19 |
| 18 | 410 | 1.1 | 0.5 | 1 | 1.31 |
| 19 | 412 | 2.9 | 0.6 | 0.91 | 1.2 |
| 20 | 406 | 2.1 | 1.1 | 0.95 | 1.25 |
| 21 | 414 | 3.1 | 0.6 | 0.9 | 1.19 |
| DT09 |  |  |  |  |  |
| 1 | 411 | 5.3 | 0.5 | 0.81 | 1.04 |
| 2 | 411 | -3.9 | 0.7 | 1.19 | 1.63 |
| 3 | 411 | 8.1 | 0.6 | 0.7 | 0.87 |
| 4 | 411 | 5.1 | 0.4 | 0.82 | 1.05 |
| 5 | 408 | 4.6 | 0.8 | 0.87 | 1.09 |
| 6 | 411 | -2.5 | 1 | 1.12 | 1.54 |
| 8 | 413 | 4.5 | 0.4 | 0.84 | 1.09 |
| 9 | 411 | 5.1 | 0.6 | 0.82 | 1.06 |
| 10 | 412 | 6.5 | 0.5 | 0.76 | 0.97 |
| 11 | 408 | 5.8 | 0.5 | 0.79 | 1.01 |
| 12 | 413 | 4.8 | 0.7 | 0.83 | 1.08 |
| RC01 |  |  |  |  |  | **Xu and Xu, 2015** |
| 1 | 439 | -5.1 |  |  | 1.72 |
| 2 | 440 | -4.7 |  |  | 1.7 |
| 3 | 440 | -5 |  |  | 1.72 |
| 4 | 442 | -5.2 |  |  | 1.73 |
| 5 | 440 | -5.4 |  |  | 1.74 |
| 6 | 443 | -4.9 |  |  | 1.71 |
| 7 | 439 | -3.2 |  |  | 1.6 |
| 8 | 442 | -3.9 |  |  | 1.65 |
| 9 | 441 | -4.5 |  |  | 1.69 |
| 10 | 441 | -3.4 |  |  | 1.62 |
| 11 | 440 | -3 |  |  | 1.59 |
| 12 | 441 | -5.1 |  |  | 1.72 |
| 13 | 438 | -5 |  |  | 1.72 |
| 14 | 442 | -5.4 |  |  | 1.74 |
| 15 | 441 | -4.3 |  |  | 1.67 |
| 16 | 443 | -4.4 |  |  | 1.68 |
| 17 | 443 | -2.9 |  |  | 1.59 |
| 18 | 450 | -3.5 |  |  | 1.63 |
| 19 | 442 | -3.2 |  |  | 1.61 |
| 20 | 442 | -4.7 |  |  | 1.7 |
| RC13 |  |  |  |  |  |
| 1 | 2442 |  |  |  |  |
| 2 | 876 | -4.6 |  |  | 2.03 |
| 3 | 431 | -2.2 |  |  | 1.53 |
| 4 | 435 | -3.1 |  |  | 1.6 |
| 5 | 639 | -2.2 |  |  | 1.69 |
| 6 | 441 | -5 |  |  | 1.72 |
| 7 | 436 | -2.5 |  |  | 1.56 |
| 8 | 439 | -1.9 |  |  | 1.52 |
| 9 | 441 | -3.3 |  |  | 1.61 |
| 10 | 432 | -3.3 |  |  | 1.6 |
| 11 | 448 | -2.2 |  |  | 1.54 |
| 12 | 434 | -4.2 |  |  | 1.66 |
| 13 | 440 | -2 |  |  | 1.53 |
| 14 | 608 | -5.5 |  |  | 1.88 |
| 15 | 439 | -5.6 |  |  | 1.75 |
| 16 | 435 | -4.8 |  |  | 1.7 |
| 17 | 444 | -1.5 |  |  | 1.5 |
| RC13-2 |  |  |  |  |  |
| 1 | 440 | -2.1 |  |  | 1.54 |
| 2 | 445 | -0.5 |  |  | 1.44 |
| 3 | 445 | -1.5 |  |  | 1.5 |
| 4 | 439 | -0.4 |  |  | 1.43 |
| 5 | 442 |  |  |  |  |
| 6 | 441 | -2.3 |  |  | 1.54 |
| 7 | 442 | -1.9 |  |  | 1.52 |
| 8 | 442 | -1.5 |  |  | 1.5 |
| 9 | 442 | -0.7 |  |  | 1.45 |
| 10 | 439 | -0.9 |  |  | 1.46 |
| 11 | 440 | -0.2 |  |  | 1.41 |
| 12 | 439 | -0.6 |  |  | 1.44 |
| RC15 |  |  |  |  |  |
| 1 | 440 | -2.3 |  |  | 1.55 |
| 2 | 441 | -2.7 |  |  | 1.57 |
| 3 | 445 | -3 |  |  | 1.6 |
| 4 | 447 | -3.4 |  |  | 1.62 |
| 5 | 442 |  |  |  |  |
| 6 | 441 | -2.9 |  |  | 1.58 |
| 7 | 446 | -6 |  |  | 1.78 |
| 8 | 443 | -2.2 |  |  | 1.54 |
| 9 | 443 | -4.9 |  |  | 1.72 |
| 10 | 443 |  |  |  |  |
| 11 | 441 |  |  |  |  |
| 12 | 443 | -3.1 |  |  | 1.6 |
| 13 | 444 |  |  |  |  |
| 14 | 437 | -4.6 |  |  | 1.69 |
| 15 | 441 | -2.8 |  |  | 1.58 |
| 16 | 439 | -3.6 |  |  | 1.63 |
| 17 | 443 | -3 |  |  | 1.6 |
| 18 | 441 | -3.4 |  |  | 1.62 |
| 19 | 442 | -4.1 |  |  | 1.66 |
| 20 | 444 | -1.2 |  |  | 1.48 |
| RC06 |  |  |  |  |  |
| 1 | 441 | -6.9 |  |  | 1.84 |
| 2 | 441 | -5.1 |  |  | 1.73 |
| 3 | 440 | -3.9 |  |  | 1.65 |
| 4 | 438 | -3.9 |  |  | 1.64 |
| 5 | 444 |  |  |  |  |
| 6 | 442 | -4.8 |  |  | 1.71 |
| 7 | 439 | -5.6 |  |  | 1.75 |
| 8 | 438 | -3.8 |  |  | 1.64 |
| 9 | 452 | -5 |  |  | 1.73 |
| 10 | 444 | -5.8 |  |  | 1.77 |
| 11 | 441 | -8 |  |  | 1.91 |
| 12 | 441 | -4.4 |  |  | 1.68 |
| 13 | 442 | -3.4 |  |  | 1.62 |
| 14 | 441 | -5.5 |  |  | 1.75 |
| 15 | 439 | -5 |  |  | 1.72 |
| 16 | 440 | -3.1 |  |  | 1.6 |
| 17 | 439 | -3 |  |  | 1.59 |
| RC08 |  |  |  |  |  |
| 1 | 443 | -6.7 |  |  | 1.82 |
| 2 | 442 | -6.3 |  |  | 1.8 |
| 3 | 442 | -6.8 |  |  | 1.83 |
| 4 | 881 | 3.9 |  |  | 1.5 |
| 5 | 444 | -7.1 |  |  | 1.85 |
| 6 | 843 | -0.1 |  |  | 1.72 |
| 7 | 445 | -5.4 |  |  | 1.75 |
| 8 | 445 | -7.3 |  |  | 1.87 |
| 9 | 441 | -3.2 |  |  | 1.61 |
| 10 | 442 | -6.8 |  |  | 1.83 |
| 11 | 561 | 0.3 |  |  | 1.47 |
| 12 | 441 | -4.9 |  |  | 1.71 |
| 13 | 440 | -6.7 |  |  | 1.83 |
| 14 | 443 | -5.5 |  |  | 1.75 |
| GD11 |  |  |  |  |  |
| 1 | 444 | -4.5 |  |  | 1.69 |
| 2 | 442 | -4.1 |  |  | 1.66 |
| 3 | 632 | -5.4 |  |  | 1.89 |
| 4 | 446 | -2.5 |  |  | 1.56 |
| 5 | 440 | -4.3 |  |  | 1.67 |
| 6 | 437 | -5.3 |  |  | 1.73 |
| 7 | 446 | -5.9 |  |  | 1.78 |
| 8 | 444 | -5.1 |  |  | 1.73 |
| 9 | 441 | -5.6 |  |  | 1.76 |
| 10 | 442 | -4.5 |  |  | 1.69 |
| 11 | 441 | -5.2 |  |  | 1.73 |
| 12 | 444 | -5.1 |  |  | 1.72 |
| 13 | 432 |  |  |  |  |
| 14 | 438 | -4.8 |  |  | 1.7 |
| 15 | 439 | -6.3 |  |  | 1.8 |
| 16 | 444 | -4.9 |  |  | 1.71 |
| 17 | 443 | -5.4 |  |  | 1.74 |
| 18 | 444 | -3.3 |  |  | 1.62 |
| GD23 |  |  |  |  |  |
| 1 | 437 | -7.5 |  |  | 1.87 |
| 2 | 435 | -6.3 |  |  | 1.79 |
| 3 | 435 | -5.1 |  |  | 1.72 |
| 4 | 441 | -7.2 |  |  | 1.86 |
| 5 | 438 | -8.3 |  |  | 1.92 |
| 6 | 438 | -5.6 |  |  | 1.76 |
| 7 | 433 | -6.5 |  |  | 1.8 |
| 8 | 442 | -7 |  |  | 1.85 |
| 9 | 438 | -7.9 |  |  | 1.9 |
| 10 | 434 | -6.4 |  |  | 1.8 |
| 11 | 437 |  |  |  |  |
| 12 | 441 | -6.5 |  |  | 1.81 |
| 13 | 437 | -7.9 |  |  | 1.9 |
| 14 | 436 | -7.5 |  |  | 1.87 |
| 15 | 439 | -4.6 |  |  | 1.69 |
| 16 | 439 | -6.8 |  |  | 1.83 |
| 17 | 441 | -8.1 |  |  | 1.91 |
| 18 | 437 | -5.8 |  |  | 1.76 |
| GD24 |  |  |  |  |  |
| 1 | 435 | -8.2 |  |  | 1.92 |
| 2 | 435 | -4.8 |  |  | 1.7 |
| 3 | 436 | -7.7 |  |  | 1.89 |
| 4 | 436 | -5.4 |  |  | 1.74 |
| 5 | 439 | -6.8 |  |  | 1.83 |
| 6 | 441 | -5.6 |  |  | 1.75 |
| 7 | 432 | -6.2 |  |  | 1.79 |
| 8 | 438 | -8.4 |  |  | 1.93 |
| 9 | 437 | -6.7 |  |  | 1.82 |
| 10 | 441 | -5.6 |  |  | 1.75 |
| 11 | 432 | -8.6 |  |  | 1.94 |
| 12 | 691 | -9.5 |  |  | 2.19 |
| 13 | 436 | -6.1 |  |  | 1.78 |
| 14 | 438 | -5.3 |  |  | 1.74 |
| 15 | 439 | -7.1 |  |  | 1.85 |
| 16 | 438 | -8.6 |  |  | 1.94 |
| 17 | 443 |  |  |  |  |
| 18 | 436 | -7.1 |  |  | 1.85 |
| RC19 |  |  |  |  |  |
| 1 | 437 | -5.2 |  |  | 1.73 |
| 2 | 438 | -6.6 |  |  | 1.82 |
| 3 | 436 | -6.9 |  |  | 1.83 |
| 4 | 448 | -5.3 |  |  | 1.74 |
| 5 | 430 | -5.1 |  |  | 1.71 |
| 6 | 437 | -5.9 |  |  | 1.77 |
| 7 | 440 | -4.5 |  |  | 1.69 |
| 8 | 425 | -4.5 |  |  | 1.67 |
| 9 | 438 | -5.7 |  |  | 1.76 |
| 10 | 439 | -4 |  |  | 1.65 |
| 11 | 433 | -7.4 |  |  | 1.87 |
| 12 | 434 |  |  |  |  |
| 13 | 442 | -5.7 |  |  | 1.76 |
| 14 | 442 | -4.4 |  |  | 1.68 |
| 15 | 437 | -4.3 |  |  | 1.67 |
| 16 | 440 | -3.3 |  |  | 1.61 |
| 17 | 440 | -4.2 |  |  | 1.67 |
| 18 | 433 | -6.8 |  |  | 1.83 |
| 19 | 437 |  |  |  |  |
| 20 | 442 |  |  |  |  |
| GD05 |  |  |  |  |  |
| 1 | 437 | -3.8 |  |  | 1.64 |
| 2 | 441 | -5 |  |  | 1.72 |
| 3 | 433 | -4.2 |  |  | 1.66 |
| 4 | 442 | -5.3 |  |  | 1.74 |
| 5 | 437 | -5.1 |  |  | 1.72 |
| 6 | 436 | -6.1 |  |  | 1.78 |
| 7 | 436 | -4.7 |  |  | 1.7 |
| 8 | 442 | -5.2 |  |  | 1.73 |
| 10 | 426 | -5.7 |  |  | 1.75 |
| 11 | 440 | -7.8 |  |  | 1.9 |
| 12 | 438 | -1.3 |  |  | 1.48 |
| 14 | 438 | -2.7 |  |  | 1.57 |
| 15 | 438 | -6.5 |  |  | 1.81 |
| 16 | 439 | -5.2 |  |  | 1.73 |
| 17 | 1043 | -5.7 |  |  | 2.23 |
| 18 | 437 | -7.1 |  |  | 1.84 |
| GD08 |  |  |  |  |  |
| 1 | 438 | -2.3 |  |  | 1.55 |
| 2 | 436 | -3.6 |  |  | 1.63 |
| 3 | 442 | -5.2 |  |  | 1.73 |
| 4 | 440 | -4.6 |  |  | 1.69 |
| 5 | 440 | -4 |  |  | 1.65 |
| 6 | 437 | -5.4 |  |  | 1.74 |
| 7 | 531 | -1.5 |  |  | 1.56 |
| 8 | 437 | -5.6 |  |  | 1.75 |
| 9 | 439 | -4.2 |  |  | 1.66 |
| 10 | 438 | -6.2 |  |  | 1.79 |
| 11 | 436 | -4.7 |  |  | 1.7 |
| 12 | 437 | -4.5 |  |  | 1.68 |
| 13 | 442 | -5.3 |  |  | 1.74 |
| 14 | 439 | -4.8 |  |  | 1.7 |
| 15 | 442 | -3.8 |  |  | 1.64 |
| 16 | 442 | -5.8 |  |  | 1.77 |
| 17 | 440 | -1.8 |  |  | 1.51 |
| YL07 |  |  |  |  |  |
| 1 | 445 | -6.2 |  |  | 1.79 |
| 2 | 435 | -6.6 |  |  | 1.82 |
| 3 | 442 | -8.7 |  |  | 1.95 |
| 4 | 442 | -7.5 |  |  | 1.88 |
| 5 | 439 | -9.6 |  |  | 2.01 |
| 6 | 435 | -11.3 |  |  | 2.11 |
| 7 | 442 | -4.9 |  |  | 1.71 |
| 8 | 433 | -8.1 |  |  | 1.91 |
| 9 | 441 | -6.9 |  |  | 1.84 |
| 10 | 437 | -8.2 |  |  | 1.92 |
| 11 | 438 | -7.8 |  |  | 1.89 |
| 12 | 437 | -6.5 |  |  | 1.81 |
| 13 | 437 | -6.2 |  |  | 1.79 |
| 14 | 439 | -5.6 |  |  | 1.75 |
| 15 | 442 | -7.3 |  |  | 1.86 |
| 16 | 441 | -8.1 |  |  | 1.91 |
| 9JH73, t = 444 ± 3 Ma | | | | | | **Zhong et al., 2016** |
| 1 |  | -18.1 | 0.9 | 1.78 | 2.15 |
| 2 |  | -19.5 | 1.3 | 1.83 | 2.22 |
| 3 |  | -22.8 | 1.7 | 2.00 | 2.38 |
| 4 |  | -20.4 | 1.2 | 1.88 | 2.26 |
| 5 |  | -9.5 | 1.5 | 1.43 | 1.72 |
| 6 |  | -19.9 | 1 | 1.85 | 2.24 |
| 7 |  | -18.6 | 1.5 | 1.80 | 2.17 |
| 8 |  | -23.1 | 1 | 1.99 | 2.40 |
| 9 |  | -21.6 | 1.3 | 1.93 | 2.33 |
| 10 |  | -16.8 | 1.2 | 1.72 | 2.09 |
| 11 |  | -26.6 | 1.2 | 2.13 | 2.57 |
| 12 |  | -19.6 | 1.2 | 1.83 | 2.22 |
| 13 |  | -23.5 | 1.3 | 2.00 | 2.42 |
| 14 |  | -21.5 | 1.4 | 1.91 | 2.32 |
| 15 |  | -24.4 | 0.8 | 2.03 | 2.47 |
| 16 |  | -22.1 | 1 | 1.94 | 2.35 |
| 17 |  | -18.3 | 1.1 | 1.79 | 2.16 |
| 18 |  | -13 | 1.2 | 1.58 | 1.89 |
| XQ10-3 |  |  |  |  |  | **Yu et al., 2016** |
| 1 | 441 | -10.1 |  |  | 1.46 |
| 2 | 442 | -7.74 |  |  | 1.37 |
| 3 | 436 | -9.43 |  |  | 1.43 |
| 4 | 442 | -12.78 |  |  | 1.56 |
| 5 | 436 | -8.12 |  |  | 1.38 |
| 6 | 427 | -10.62 |  |  | 1.47 |
| 7 | 403 | -9.08 |  |  | 1.38 |
| 8 | 436 | -12.07 |  |  | 1.54 |
| 9 | 435 | -10.89 |  |  | 1.51 |
| 10 | 443 | -9.58 |  |  | 1.46 |
| 11 | 433 | -9.04 |  |  | 1.42 |
| 12 | 431 | -13.77 |  |  | 1.57 |
| 13 | 760 | -13.22 |  |  | 1.86 |
| 14 | 451 | -8.91 |  |  | 1.42 |
| 15 | 444 | -7.76 |  |  | 1.38 |
| 16 | 449 | -7.41 |  |  | 1.36 |
| 17 | 436 | -8.53 |  |  | 1.4 |
| 18 | 432 | -6.56 |  |  | 1.33 |
| XQ10-13 |  |  |  |  |  |
| 1 | 445 | -6.49 |  |  | 1.33 |
| 2 | 443 | -6.32 |  |  | 1.31 |
| 3 | 429 | -10.39 |  |  | 1.45 |
| 4 | 433 | -7.73 |  |  | 1.36 |
| 5 | 438 | -5.99 |  |  | 1.3 |
| 6 | 443 | -8.93 |  |  | 1.42 |
| 7 | 437 | -8.58 |  |  | 1.4 |
| 8 | 444 | -5.88 |  |  | 1.31 |
| 9 | 444 | -7.06 |  |  | 1.35 |
| 10 | 436 | -7.14 |  |  | 1.34 |
| 11 | 446 | -7.12 |  |  | 1.36 |
| 12 | 433 | -10.04 |  |  | 1.51 |
| 13 | 443 | -10.13 |  |  | 1.48 |
| 14 | 430 | -6.58 |  |  | 1.32 |
| 15 | 430 | -7.23 |  |  | 1.34 |
| 16 | 443 | -3.88 |  |  | 1.24 |
| 17 | 442 | -10.53 |  |  | 1.5 |
| 18 | 443 | -5.51 |  |  | 1.29 |
| 19 | 440 | -8.2 |  |  | 1.39 |
| 20 | 456 | -6.34 |  |  | 1.33 |
| XQ10-15 |  |  |  |  |  |
| 1 | 424 | -8.45 |  |  | 1.39 |
| 2 | 440 | -4.76 |  |  | 1.24 |
| 3 | 442 | -5.24 |  |  | 1.28 |
| 4 | 462 | -9.48 |  |  | 1.46 |
| 5 | 439 | -7.34 |  |  | 1.35 |
| 6 | 440 | -8.66 |  |  | 1.4 |
| 7 | 437 | -5.19 |  |  | 1.25 |
| 8 | 437 | -4.79 |  |  | 1.23 |
| 9 | 434 | -3.92 |  |  | 1.2 |
| 10 | 421 | -5.22 |  |  | 1.24 |
| 11 | 419 | -5.63 |  |  | 1.25 |
| SX08 |  |  |  |  |  | **Xu and Xu, 2017** |
| 1 |  | -7.8 | 0.8 |  | 1.75 |
| 2 |  | -8.6 | 0.8 |  | 1.80 |
| 3 |  | -7.9 | 0.8 |  | 1.76 |
| 4 |  | -6.2 | 0.7 |  | 1.66 |
| 5 |  | -7 | 0.9 |  | 1.71 |
| 6 |  | -7.6 | 1.4 |  | 1.74 |
| 7 |  | -10 | 0.8 |  | 1.88 |
| 8 |  | -7 | 1.1 |  | 1.71 |
| 9 |  | -6.9 | 0.9 |  | 1.70 |
| 10 |  | -7.9 | 1 |  | 1.76 |
| 11 |  | -5.8 | 1 |  | 1.63 |
| 12 |  | -7.5 | 1 |  | 1.74 |
| 13 |  | -6.8 | 0.9 |  | 1.69 |
| 14 |  | -7.5 | 1 |  | 1.73 |
| 15 |  | -8.9 | 1.6 |  | 1.81 |
| 16 |  | -8 | 1.4 |  | 1.77 |
| 17 |  | -7.2 | 1 |  | 1.71 |
| 18 |  | -7.6 | 1.6 |  | 1.75 |
| 19 |  | -5.2 | 1.6 |  | 1.60 |
| 20 |  | -8.5 | 1 |  | 1.79 |
| 21 |  | -8.6 | 1.7 |  | 1.80 |
| SX13 |  |  |  |  |  |
| 1 |  | -7.1 | 2.2 |  | 1.71 |
| 2 |  | -8.9 | 1.1 |  | 1.81 |
| 4 |  | -7.7 | 1.1 |  | 1.75 |
| 6 |  | -7 | 1.1 |  | 1.71 |
| 7 |  | -8.3 | 1 |  | 1.78 |
| 8 |  | -7.1 | 1.1 |  | 1.71 |
| 9 |  | -6.2 | 1.2 |  | 1.66 |
| 10 |  | -8.9 | 1 |  | 1.82 |
| 11 |  | -8.9 | 1.1 |  | 1.81 |
| 12 |  | -8.5 | 1 |  | 1.79 |
| 13 |  | -8.4 | 0.9 |  | 1.79 |
| SX031 |  |  |  |  |  |
| 1 |  | -9.5 | 1 |  | 1.85 |
| 2 |  | -9.3 | 0.9 |  | 1.83 |
| 4 |  | -7.6 | 1.2 |  | 1.74 |
| 5 |  | -7.3 | 1.1 |  | 1.72 |
| 7 |  | -7.3 | 0.9 |  | 1.73 |
| 8 |  | -7.3 | 1 |  | 1.72 |
| 10 |  | -7.8 | 1.1 |  | 1.75 |
| 11 |  | -8.5 | 1.1 |  | 1.79 |
| 12 |  | -8.7 | 1 |  | 1.81 |
| 14 |  | -6.7 | 1.1 |  | 1.69 |
| 15 |  | -6.7 | 1 |  | 1.69 |
| 16 |  | -8.6 | 1.3 |  | 1.79 |
| GD14 |  |  |  |  |  | **Xu and Xu, 2015** |
| 1 | 437 | -9 |  |  | 1.96 |
| 2 | 436 | -6.4 |  |  | 1.80 |
| 3 | 437 | -6.4 |  |  | 1.80 |
| 4 | 434 | -4.4 |  |  | 1.67 |
| 5 | 432 | -8.6 |  |  | 1.94 |
| 6 | 441 | -5.3 |  |  | 1.74 |
| 7 | 433 | -11.2 |  |  | 2.10 |
| 8 | 435 | -7.4 |  |  | 1.86 |
| 9 | 439 | -12.3 |  |  | 2.18 |
| 10 | 437 | -15.1 |  |  | 2.35 |
| 11 | 435 |  |  |  |  |
| 12 | 434 | -8.2 |  |  | 1.91 |
| 13 | 437 | -6.4 |  |  | 1.80 |
| 14 | 2140 | -7 |  |  | 3.16 |
| 15 | 439 | -9.1 |  |  | 1.98 |
| GD18 |  |  |  |  |  |
| 1 | 1097 | 3.5 |  |  | 1.68 |
| 2 | 435 | -11.9 |  |  | 2.15 |
| 3 | 436 | -9 |  |  | 1.96 |
| 4 | 898 | -12.1 |  |  | 2.51 |
| 5 | 1675 | -1.3 |  |  | 2.43 |
| 6 | 673 | -7.5 |  |  | 2.05 |
| 7 | 546 | -8.4 |  |  | 2.01 |
| 8 | 1110 | -4.9 |  |  | 2.23 |
| 9 | 435 | -7.8 |  |  | 1.89 |
| 10 | 430 | -9.9 |  |  | 2.02 |
| 11 | 432 | -6.4 |  |  | 1.80 |
| 12 | 426 | -10.6 |  |  | 2.06 |
| 13 | 431 | -8.9 |  |  | 1.95 |
| 14 | 434 |  |  |  |  |
| 15 | 435 | -10.8 |  |  | 2.08 |
| 16 | 1661 | 1.6 |  |  | 2.25 |
| 17 | 431 | -8.1 |  |  | 1.91 |
| 18 | 1368 | -0.1 |  |  | 2.13 |
| 19 | 2399 | 1 |  |  | 2.87 |
| 20 | 978 | 0.1 |  |  | 1.81 |
| 21 | 1003 |  |  |  |  |
| YL09 |  |  |  |  |  |
| 1 | 432 | -9.4 |  |  | 1.99 |
| 2 | 431 | -8.1 |  |  | 1.91 |
| 3 | 430 | -9.6 |  |  | 2.00 |
| 4 | 432 | -12.3 |  |  | 2.17 |
| 5 | 427 | -8.4 |  |  | 1.92 |
| 6 | 432 | -9.4 |  |  | 1.99 |
| 7 | 433 | -10 |  |  | 2.02 |
| 8 | 429 | -9.2 |  |  | 1.97 |
| 9 | 437 | -9.1 |  |  | 1.98 |
| 10 | 431 | -10 |  |  | 2.02 |
| 11 | 1014 | -2.3 |  |  | 1.99 |
| 12 | 1015 | -0.8 |  |  | 1.90 |
| 13 | 429 | -9.5 |  |  | 1.99 |
| 14 | 434 | -7.8 |  |  | 1.89 |
| 15 | 424 | -8.2 |  |  | 1.90 |
| 16 | 431 | -7.7 |  |  | 1.88 |
| YL10 |  |  |  |  |  |
| 1 | 433 | -7.4 |  |  | 1.86 |
| 2 | 433 | -8 |  |  | 1.90 |
| 3 | 432 | -9.2 |  |  | 1.97 |
| 4 | 430 | -9.4 |  |  | 1.99 |
| 5 | 3114 | 3.4 |  |  | 3.29 |
| 6 | 431 | -9.1 |  |  | 1.97 |
| 7 | 435 | -6.1 |  |  | 1.78 |
| 8 | 436 |  |  |  |  |
| 9 | 435 | -8.3 |  |  | 1.92 |
| 10 | 1064 | -2.6 |  |  | 2.05 |
| 11 | 433 | -9.9 |  |  | 2.02 |
| 12 | 432 | -9.8 |  |  | 2.01 |
| 13 | 435 | -6.2 |  |  | 1.79 |
| 14 | 428 | -6.6 |  |  | 1.81 |
| 15 | 428 | -7.1 |  |  | 1.84 |
| 16 | 431 | -7.5 |  |  | 1.87 |
| 17 | 428 | -7.7 |  |  | 1.88 |
| 17GZ08-1 |  |  |  |  |  | **Liu et al., 2021b** |
| 1 | 442 | -3.8 | 0.33 |  | 1.67 |
| 2 | 442 | -6.1 | 0.29 |  | 1.81 |
| 3 | 442 | -6 | 0.26 |  | 1.81 |
| 4 | 442 | -5.7 | 0.27 |  | 1.79 |
| 5 | 442 | -4.1 | 0.30 |  | 1.69 |
| 6 | 442 | -5.6 | 0.29 |  | 1.78 |
| 7 | 442 | -5.6 | 0.26 |  | 1.79 |
| 8 | 442 | -5.2 | 0.29 |  | 1.76 |
| 9 | 442 | -6.8 | 0.28 |  | 1.86 |
| 10 | 442 | -3.6 | 0.26 |  | 1.66 |
| 11 | 442 | -7.9 | 0.28 |  | 1.93 |
| 12 | 442 | -8.3 | 0.30 |  | 1.96 |
| 13 | 442 | -7.9 | 0.33 |  | 1.93 |
| 14 | 442 | -10.3 | 0.37 |  | 2.08 |
| 15 | 442 | -4.1 | 0.28 |  | 1.69 |
| 16 | 442 | -5 | 0.27 |  | 1.75 |
| 17 | 442 | -6.9 | 0.28 |  | 1.87 |
| 18 | 442 | -6.1 | 0.35 |  | 1.82 |
| 19 | 442 | -5.1 | 0.30 |  | 1.75 |
| 20 | 442 | -1.7 | 0.27 |  | 1.54 |
| HT-9a |  |  |  |  |  | **Feng et al., 2014** |
| 1 | 418 | −7.1 |  |  | 1.85 |
| 2 | 415 | −8.4 |  |  | 1.93 |
| 3 | 418 | −5.8 |  |  | 1.78 |
| 4 | 416 | −7.5 |  |  | 1.88 |
| 5 | 418 | −7.8 |  |  | 1.90 |
| 6 | 414 | −8.2 |  |  | 1.92 |
| 7 | 413 | −7.1 |  |  | 1.85 |
| 8 | 415 | −8.6 |  |  | 1.95 |
| 9 | 415 | −7.5 |  |  | 1.87 |
| 10 | 415 | −8.0 |  |  | 1.91 |
| 11 | 412 | −6.8 |  |  | 1.83 |
| 12 | 412 | −14.9 |  |  | 2.34 |
| 13 | 418 | −6.1 |  |  | 1.79 |
| 14 | 415 | −8.9 |  |  | 1.97 |
| 15 | 415 | −7.0 |  |  | 1.85 |
| 16 | 415 | −7.9 |  |  | 1.90 |
| 17 | 415 | −7.0 |  |  | 1.84 |
| 18 | 416 | −8.5 |  |  | 1.94 |
| 19 | 415 | −8.2 |  |  | 1.92 |
| 20 | 415 | −11.9 |  |  | 2.16 |
| 21 | 415 | −7.6 |  |  | 1.88 |
| 22 | 415 | −7.5 |  |  | 1.88 |
| 23 | 415 | −6.0 |  |  | 1.78 |
| 24 | 415 | −9.0 |  |  | 1.97 |
| EP-4 |  |  |  |  |  |
| 1 | 444 | −7.0 |  |  | 1.87 |
| 2 | 411 | −8.1 |  |  | 1.92 |
| 3 | 413 | −7.0 |  |  | 1.84 |
| 4 | 445 | −8.1 |  |  | 1.94 |
| 5 | 415 | −5.2 |  |  | 1.73 |
| 6 | 446 | −10.5 |  |  | 2.09 |
| 7 | 444 | −4.4 |  |  | 1.70 |
| 8 | 419 | −3.9 |  |  | 1.65 |
| 9 | 416 | −6.3 |  |  | 1.80 |
| 10 | 412 | −5.5 |  |  | 1.75 |
| 11 | 414 | −5.1 |  |  | 1.72 |
| 12 | 444 | −8.2 |  |  | 1.94 |
| 13 | 443 | −6.7 |  |  | 1.85 |
| 14 | 411 | −7.6 |  |  | 1.88 |
| 15 | 408 | −4.9 |  |  | 1.71 |
| 16 | 411 | −4.8 |  |  | 1.71 |
| 17 | 415 | −8.1 |  |  | 1.91 |
| 18 | 418 | −8.1 |  |  | 1.92 |
| HT-9b |  |  |  |  |  |
| 1 | 415 | −7.5 |  |  | 1.88 |
| 2 | 415 | −8.7 |  |  | 1.95 |
| 3 | 415 | −6.2 |  |  | 1.79 |
| 5 | 415 | −8.9 |  |  | 1.96 |
| 6 | 415 | −7.4 |  |  | 1.87 |
| 7 | 415 | −10.0 |  |  | 2.03 |
| 8 | 415 | −3.5 |  |  | 1.62 |
| 9 | 415 | −9.2 |  |  | 1.99 |
| 10 | 415 | −11.5 |  |  | 2.13 |
| 11 | 415 | −5.4 |  |  | 1.75 |
| 12 | 415 | −10.1 |  |  | 2.04 |
| Z6365-YP267 |  |  |  |  |  | **Dang et al., 2018** |
| 1 | 444 | -1.3 | 1.4 |  | 1.50 |
| 2 | 439 | -2.8 | 0.9 |  | 1.59 |
| 3 | 446 | -1.3 | 1.3 |  | 1.50 |
| 4 | 441 | -3.1 | 1.1 |  | 1.61 |
| 5 | 452 | -3.1 | 2.1 |  | 1.62 |
| 6 | 867 | 0.7 | 2.3 |  | 1.69 |
| 7 | 445 | -1.3 | 1.7 |  | 1.50 |
| 8 | 446 | -1.2 | 1.4 |  | 1.49 |
| 9 | 438 | -1 | 1.4 |  | 1.48 |
| 10 | 438 | -2.8 | 1.7 |  | 1.59 |
| 11 | 442 | -1.1 | 1.2 |  | 1.48 |
| 12 | 466 | -1.4 | 1.5 |  | 1.52 |
| 13 | 440 | -2.7 | 2 |  | 1.59 |
| 14 | 438 | -2.7 | 1.7 |  | 1.58 |
| 15 | 442 | -1.1 | 1.7 |  | 1.49 |
| 16 | 993 | -0.2 | 2.9 |  | 1.84 |
| 17 | 444 | -1.4 | 1.4 |  | 1.51 |
| 18 | 1020 | -4.1 | 1.1 |  | 2.10 |
| 19 | 437 | -3.2 | 1.8 |  | 1.61 |
| 20 | 972 | 7.3 | 1.3 |  | 1.36 |
| 21 | 446 | -0.8 | 1.8 |  | 1.47 |
| 22 | 439 | -2.8 | 1.5 |  | 1.59 |
| 23 | 437 | -6.8 | 1.7 |  | 1.84 |

**References**

Dang, Y., Chen, M.H., Fu, B., Mao, J.W., Fanning, C.M., Li, Z.Y., 2018. Petrogenesis of the Yupo W-bearing and Dali Mo-bearing granitoids in the Dayaoshan area, South China: Constraints of geochronology and geochemistry. Ore Geology Reviews 92, 643–655.

Feng, S.J., Zhao, K.D., Ling, H.F., Chen, P.R., Chen, W.F., Sun, T., Jiang, S.Y., Pu, W., 2014. Geochronology, elemental and Nd–Hf isotopic geochemistry of Devonian A-type granites in central Jiangxi, South China: Constraints on petrogenesis and post-collisional extension of the Wuyi–Yunkai orogeny. Lithos 206–207, 1–18.

Li, X.L., Yu, J.H., Jiang, D.S., Griffin, W.L., Jiang, W., Xu, H., 2021b. Linking ocean subduction with early Paleozoic intracontinental orogeny in South China: Insights from the Xiaying complex in eastern Guangxi Province. Lithos 398–399, 106258.

Liu, X., Wang, Q., Ma, L., Yang, J.H., Ma, Y.M., Huang, T.Y., 2021b. Early Paleozoic and Late Mesozoic crustal reworking of the South China Block: Insights from Early Silurian biotite granodiorites and Late Jurassic biotite granites in the Guangzhou area of the south-east Wuyi-Yunkai orogeny. Journal of Asian Earth Sciences 219, 104890.

Xia, Y., Xu, X.S., Zou, H.B., Liu, L., 2014. Early Paleozoic crust–mantle interaction and lithosphere delamination in South China Block: Evidence from geochronology, geochemistry, and Sr–Nd–Hf isotopes of granites. Lithos 184–187, 416–435.

Xie, Y.X., Ma, L.Y., Zhao, G.C., Xie, C.F., Han, Y.G., Li, J.H., Liu, Q., Yao, J.L., Zhang, Y.Y., Lu, Y.F., 2020. Origin of the Heping granodiorite pluton: Implications for syn-convergent extension and asthenosphere upwelling accompanying the early Paleozoic orogeny in South China. Gondwana Research 85, 149–168.

Xu, W.J., Xu, S.H., 2015. Early Paleozoic intracontinental felsic magmatism in the South China Block: Petrogenesis and geodynamics. Lithos 234–235, 79–92.

Xu, W.J., Xu, S.H., 2017. An early Paleozoic monzonorite–granite suite in the South China block: Implications for the intracontinental felsic magmatism. Mineralogy and Petrology 111, 709–728.

Yu, Y., Huang, X.L., He, P.L., Li, J., 2016. I-type granitoids associated with the early Paleozoic intracontinental orogenic collapse along pre-existing block boundary in South China. Lithos 248–251, 353–365.

Zhong, Y.F., Wang, L.X., Zhao, J.H., Liu, L., Ma, C.Q., Zheng, J.P., Zhang, Z.J., Luo, B.J., 2016. Partial melting of an ancient sub-continental lithospheric mantle in the early Paleozoic intracontinental regime and its contribution to petrogenesis of the coeval peraluminous granites in South China. Lithos 264, 224–238.
